# Supplementary material for: Mortality after second malignancy in breast cancer survivors compared to a first primary cancer: a nationwide longitudinal cohort study
Source: PubMed Central journal article supplement (PMC9283416; doi:10.1038/s41523-022-00447-5), 2022-07-14
Supplement: 41523_2022_447_MOESM1_ESM.pdf [file 41523_2022_447_MOESM1_ESM.pdf]

Supplementary Table 1. Demographic and clinical characteristics in the unmatched study population.

| Characteristics                       | FPC<br>(n=1471886), No. (%) | SPC among<br>breast cancer survivors<br>(n=31712), No. (%) |
|---------------------------------------|-----------------------------|------------------------------------------------------------|
| Age of diagnosis, mean (SD),<br>years | 62.1 (15.3)                 | 66.6 (13.1)                                                |
| Race                                  |                             |                                                            |
| White                                 | 1209249 (82.2%)             | 26094 (82.3%)                                              |
| Black                                 | 149433 (10.2%)              | 3501 (11.0%)                                               |
| Other                                 | 113204 (7.7%)               | 2117 (6.7%)                                                |
| Primary Site                          |                             |                                                            |
| Breast                                | 568454 (38.6%)              | 13931 (43.9%)                                              |
| Lung                                  | 222716 (15.1%)              | 4850 (15.3%)                                               |
| Colorectal                            | 176739 (12.0%)              | 3351 (10.6%)                                               |
| Uterus                                | 119747 (8.1%)               | 2392 (7.5%)                                                |
| Lymphoma                              | 79886 (5.4%)                | 1191 (3.8%)                                                |
| Thyroid                               | 84852 (5.8%)                | 1268 (4.0%)                                                |
| Melanoma                              | 66509 (4.5%)                | 1261 (4.0%)                                                |
| Ovary                                 | 59188 (4.0%)                | 1095 (3.5%)                                                |
| Pancreas                              | 49792 (3.4%)                | 1130 (3.6%)                                                |
| Leukemia                              | 44003 (3.0%)                | 1243 (3.9%)                                                |
| Tumor Stage                           |                             |                                                            |
| Local                                 | 698600 (47.5%)              | 16739 (52.8%)                                              |
| Regional                              | 396555 (26.9%)              | 7591 (23.9%)                                               |
| Distant                               | 376731 (25.6%)              | 7382 (23.3%)                                               |
| Year of Diagnosis                     |                             |                                                            |
| 2000-2004                             | 411912 (28.0%)              | 3393 (10.7%)                                               |
| 2005-2009                             | 501117 (34.0%)              | 10592 (33.4%)                                              |
| 2010-2014                             | 558857 (38.0%)              | 17727 (55.9%)                                              |
| Surgery <sup>1</sup>                  |                             |                                                            |
| No/Unknown                            | 407739 (27.7%)              | 8755 (27.6%)                                               |
| Yes                                   | 1064147 (72.3%)             | 22957 (72.4%)                                              |
| Chemotherapy <sup>1</sup>             |                             |                                                            |
| No/Unknown                            | 924419 (62.8%)              | 21476 (67.7%)                                              |
| Yes                                   | 547467 (37.2%)              | 10236 (32.3%)                                              |
| Radiotherapy <sup>1</sup>             |                             |                                                            |
| No/Unknown                            | 986094 (67.0%)              | 24585 (77.5%)                                              |
| Yes                                   | 485792 (33.0%)              | 7127 (22.5%)                                               |

FPC: first primary cancer

SPC: second primary cancer

<sup>1</sup>This indicates initial treatment

Supplementary Table 2. Hazard ratios (95% confidence interval) of cancer and all-cause mortality comparing SPC to FPC in sensitivity analyses.

|                                                                                                | Cancer mortality | All-cause mortality |
|------------------------------------------------------------------------------------------------|------------------|---------------------|
| PS matched <sup>1</sup> and adjusted for race/ethnicity <sup>2</sup> and 18 cancer registries  | 1.27 (1.24,1.31) | 1.18 (1.16,1.21)    |
| PS matched <sup>1</sup> and unadjusted (Subdistribution hazard ratio from Fine and Gray model) | 1.27 (1.24,1.31) | -                   |

FPC: first primary cancer, SPC: second primary cancer, PS: propensity score

<sup>1</sup>Matched variables: race (White, Black, and Other), age at diagnosis (continuous), calendar year of diagnosis (every year 2000-2014), primary site (10 cancer types), summary tumor stage (local, regional, and distant), and treatments (surgery, chemotherapy, and radiotherapy)

<sup>2</sup>Racial/ethnic groups included: Non-Hispanic White, Non-Hispanic Black, Non-Hispanic American Indian or Alaska Native, Non-Hispanic Asian or Pacific Islander, and Hispanic (All Races).

Supplementary Table 3. Hazard ratios (HRs) comparing cancer mortality after the first breast cancer to cancer mortality after the second breast cancer by molecular subtype of the prior breast cancer.

|                         | Number of cases | Person-months | Number of deaths | HR (95%CI) <sup>1</sup> |
|-------------------------|-----------------|---------------|------------------|-------------------------|
| BC                      | 7244            | 317077        | 652              | 1.00 (Reference)        |
| Luminal A BC + BC       | 618             | 21871         | 94               | 2.16 (1.73,2.69)        |
| Luminal B BC + BC       | 68              | 2107          | 16               | 3.29 (1.98,5.48)        |
| Triple negative BC + BC | 125             | 3784          | 42               | 2.57 (1.85,3.57)        |
| HER2 enriched BC + BC   | 35              | 1134          | 4                | 1.86 (0.69,5.03)        |

This analysis was based on breast cancer cases diagnosed between 2010 and 2014.

HR: hazard ratio, CI: confidence interval, BC: breast cancer

Luminal A = Hormone receptor-positive and HER2-negative

Luminal B = Hormone receptor-positive and HER2-positive

Triple Negative = Hormone receptor-negative and HER2-negative

HER2 enriched = Hormone receptor-negative and HER2-positive

<sup>1</sup>Models adjusted for race, year of diagnosis, age at diagnosis, tumor stage, treatments (surgery, chemotherapy, and radiotherapy), and subtype of BC.

Supplementary Table 4. Hazard ratios (HRs) comparing cancer mortality after the second breast cancer diagnosed  $\geq 1$  year after the prior breast cancer to cancer mortality after the first breast cancer, and for ipsilateral and contralateral second breast cancer separately.

|                                     | Number of cases | Person-months | Number of deaths | HR (95%CI) <sup>1</sup> |
|-------------------------------------|-----------------|---------------|------------------|-------------------------|
| BC                                  | 13903           | 903004.5      | 1815             | 1.00 (Reference)        |
| BC + BC $\geq 1$ year               | 13115           | 767906        | 2909             | 1.78 (1.67,1.89)        |
| BC + ipsilateral BC $\geq 1$ year   | 3868            | 215063.5      | 748              | 1.49 (1.36,1.64)        |
| BC + contralateral BC $\geq 1$ year | 9190            | 551045        | 2127             | 1.90 (1.78,2.03)        |

HR: hazard ratio, CI: confidence interval, BC: breast cancer

<sup>1</sup>Models adjusted for race, year of diagnosis, age at diagnosis, tumor stage, treatments (surgery, chemotherapy, and radiotherapy), and estrogen receptor status.

Supplementary Table 5. Hazard ratios (HRs) comparing cancer mortality after the second primary cancer (SPC) developed  $\leq 5$  years and  $> 5$  years to cancer mortality after the first primary cancer (FPC) separately. Survivors were limited to women who had a local stage breast cancer and received surgery.

|                                       | Total number of FPC/SPC | Person-months | Total number of deaths | HR (95%CI) <sup>1</sup> |
|---------------------------------------|-------------------------|---------------|------------------------|-------------------------|
| Breast cancer                         | 13903                   | 903004.5      | 1815                   | 1.00 (Reference)        |
| BC + BC $\leq 5$ years                | 4016                    | 310634        | 750                    | 1.48 (1.35,1.63)        |
| BC + BC $> 5$ years                   | 4984                    | 260797        | 588                    | 1.12 (1.01,1.24)        |
| Lung cancer                           | 4900                    | 121576        | 3283                   | 1.00 (Reference)        |
| BC + Lung cancer $\leq 5$ years       | 1820                    | 49821.5       | 1270                   | 0.95 (0.89,1.02)        |
| BC + Lung cancer $> 5$ years          | 1538                    | 33776         | 1011                   | 0.91 (0.85,0.98)        |
| Colorectal cancer                     | 3424                    | 181289.5      | 1079                   | 1.00 (Reference)        |
| BC + Colorectal cancer $\leq 5$ years | 1349                    | 83232.5       | 419                    | 0.99 (0.88,1.11)        |
| BC + Colorectal cancer $> 5$ years    | 823                     | 35109.5       | 253                    | 0.95 (0.82,1.09)        |
| Uterine cancer                        | 2335                    | 147537.5      | 433                    | 1.00 (Reference)        |
| BC + Uterine cancer $\leq 5$ years    | 889                     | 65077         | 200                    | 1.20 (1.01,1.42)        |
| BC + Uterine cancer $> 5$ years       | 742                     | 37073.5       | 203                    | 1.34 (1.13,1.59)        |
| Lymphoma                              | 1202                    | 60396.5       | 391                    | 1.00 (Reference)        |
| BC + Lymphoma $\leq 5$ years          | 457                     | 25443         | 160                    | 1.00 (0.83,1.20)        |
| BC + Lymphoma $> 5$ years             | 392                     | 15031.5       | 148                    | 1.21 (1.00,1.47)        |
| Thyroid cancer                        | 1237                    | 86451.5       | 32                     | 1.00 (Reference)        |
| BC + Thyroid cancer $\leq 5$ years    | 498                     | 37968         | 25                     | 1.61 (0.93,2.80)        |
| BC + Thyroid cancer $> 5$ years       | 274                     | 15059.5       | 18                     | 2.46 (1.30,4.66)        |
| Melanoma                              | 1240                    | 81894.5       | 106                    | 1.00 (Reference)        |
| BC + Melanoma $\leq 5$ years          | 524                     | 39053         | 62                     | 1.04 (0.75,1.44)        |
| BC + Melanoma $> 5$ years             | 300                     | 15672         | 30                     | 0.99 (0.64,1.53)        |
| Ovarian cancer                        | 1113                    | 49886         | 631                    | 1.00 (Reference)        |
| BC + Ovarian cancer $\leq 5$ years    | 441                     | 22767         | 261                    | 0.91 (0.79,1.05)        |
| BC + Ovarian cancer $> 5$ years       | 296                     | 10305         | 173                    | 1.03 (0.87,1.23)        |
| Pancreatic cancer                     | 1093                    | 12472.5       | 959                    | 1.00 (Reference)        |

|                                  |      |         |     |                  |
|----------------------------------|------|---------|-----|------------------|
| BC + Pancreatic cancer ≤ 5 years | 446  | 5471.5  | 404 | 1.00 (0.89,1.13) |
| BC + Pancreatic cancer > 5 years | 331  | 3426.5  | 292 | 0.91 (0.80,1.04) |
| Leukemia                         | 1265 | 53258   | 576 | 1.00 (Reference) |
| BC + Leukemia ≤ 5 years          | 441  | 16585.5 | 249 | 1.26 (1.08,1.46) |
| BC + Leukemia > 5 years          | 259  | 6833    | 147 | 1.37 (1.13,1.65) |

FPC: first primary cancer, SPC: second primary cancer, HR: hazard ratio, CI: confidence interval, BC: breast cancer

<sup>1</sup>Models adjusted for race, year of diagnosis, age at diagnosis, tumor stage, and treatments (surgery, chemotherapy, and radiotherapy). For breast cancer, we further adjusted for estrogen receptor status. For leukemia, we omitted surgery (it was not a treatment option) and tumor stage (all leukemia were distant stage).

Supplementary Table 6. Hazard ratios (HRs) comparing cancer mortality after the second primary cancer (SPC) in breast cancer survivors (restricted to survivors with prior breast cancer of local stage and received surgery and chemotherapy) to cancer mortality after the first primary cancer (FPC) for different types of cancer. All estrogen receptor-negative survivors were assumed to receive chemotherapy for their first breast cancer.

|                        | Number of cases | Person-months | Number of deaths | HR (95%CI) <sup>1</sup> |
|------------------------|-----------------|---------------|------------------|-------------------------|
| Breast cancer          | 13903           | 903004.5      | 1815             | 1.00 (Reference)        |
| BC + BC                | 3316            | 209168.5      | 617              | 1.52 (1.38,1.68)        |
| Lung cancer            | 4900            | 121576        | 3283             | 1.00 (Reference)        |
| BC + Lung cancer       | 957             | 23923.5       | 700              | 1.06 (0.98,1.15)        |
| Colorectal cancer      | 3424            | 181289.5      | 1079             | 1.00 (Reference)        |
| BC + Colorectal cancer | 583             | 30323         | 193              | 1.24 (1.06,1.45)        |
| Uterine cancer         | 2335            | 147537.5      | 433              | 1.00 (Reference)        |
| BC + Uterine cancer    | 525             | 34227         | 120              | 1.59 (1.29,1.96)        |
| Lymphoma               | 1202            | 60396.5       | 391              | 1.00 (Reference)        |
| BC + Lymphoma          | 192             | 9996.5        | 67               | 1.26 (0.97,1.64)        |
| Thyroid cancer         | 1237            | 86451.5       | 32               | 1.00 (Reference)        |
| BC + Thyroid cancer    | 299             | 20661.5       | 18               | 4.02 (2.16,7.48)        |
| Melanoma               | 1240            | 81894.5       | 106              | 1.00 (Reference)        |
| BC + Melanoma          | 278             | 19036.5       | 25               | 1.39 (0.86,2.25)        |
| Ovarian cancer         | 1113            | 49886         | 631              | 1.00 (Reference)        |
| BC + Ovarian cancer    | 278             | 13513         | 152              | 0.99 (0.82,1.19)        |
| Pancreatic cancer      | 1093            | 12472.5       | 959              | 1.00 (Reference)        |
| BC + Pancreatic cancer | 196             | 2801          | 172              | 1.00 (0.85,1.19)        |
| Leukemia               | 1265            | 53258         | 576              | 1.00 (Reference)        |
| BC + Leukemia          | 266             | 7645          | 167              | 1.83 (1.54,2.19)        |

FPC: first primary cancer, SPC: second primary cancer, HR: hazard ratio, CI: confidence interval, BC: breast cancer

<sup>1</sup>Models adjusted for race, year of diagnosis, age at diagnosis, tumor stage, and treatments (surgery, chemotherapy, and radiotherapy). For breast cancer, we further adjusted for estrogen receptor status. For leukemia, we omitted surgery (it was not a treatment option) and tumor stage (all leukemia were distant stage).

Supplementary Table 7. Hazard ratios (HRs) comparing cancer mortality after the second primary cancer (SPC) in breast cancer survivors (restricted to survivors with prior breast cancer of local stage and received surgery and radiotherapy as well as survivors who received surgery, radiotherapy, and chemotherapy) to cancer mortality after the first primary cancer (FPC) for different types of cancer. HRs for overall, ER-positive, and ER-negative breast cancer survivors are presented separately.

|                                    | Surgery + Radiotherapy |               |                  |                         | Surgery + Radiotherapy + Chemotherapy |               |                  |                         |
|------------------------------------|------------------------|---------------|------------------|-------------------------|---------------------------------------|---------------|------------------|-------------------------|
|                                    | Number of cases        | Person-months | Number of deaths | HR (95%CI) <sup>1</sup> | Number of cases                       | Person-months | Number of deaths | HR (95%CI) <sup>1</sup> |
| Breast cancer                      | 13903                  | 903004.5      | 1815             | 1.00 (Reference)        | 13903                                 | 903004.5      | 1815             | 1.00 (Reference)        |
| BC + BC                            | 5158                   | 330998.5      | 689              | 1.25 (1.13,1.37)        | 1645                                  | 104390        | 295              | 1.74 (1.52,1.99)        |
| ER-positive BC + BC                | 3631                   | 229188.5      | 431              | 1.17 (1.04,1.30)        | 803                                   | 50289.5       | 137              | 1.74 (1.45,2.09)        |
| ER-negative BC + BC                | 1119                   | 70957         | 206              | 1.61 (1.37,1.88)        | 738                                   | 46136.5       | 143              | 1.83 (1.52,2.21)        |
| Lung cancer                        | 4900                   | 121576        | 3283             | 1.00 (Reference)        | 4900                                  | 121576        | 3283             | 1.00 (Reference)        |
| BC + Lung cancer                   | 1811                   | 46823.5       | 1193             | 0.92 (0.86,0.98)        | 392                                   | 10469         | 273              | 1.04 (0.92,1.18)        |
| ER-positive BC + Lung cancer       | 1389                   | 37742         | 877              | 0.87 (0.80,0.93)        | 218                                   | 6599.5        | 144              | 0.96 (0.81,1.14)        |
| ER-negative BC + Lung cancer       | 283                    | 6375          | 211              | 1.11 (0.96,1.27)        | 150                                   | 3375.5        | 110              | 1.13 (0.93,1.37)        |
| Colorectal cancer                  | 3424                   | 181289.5      | 1079             | 1.00 (Reference)        | 3424                                  | 181289.5      | 1079             | 1.00 (Reference)        |
| BC + Colorectal cancer             | 1114                   | 64679         | 308              | 0.88 (0.77,1.00)        | 210                                   | 11853         | 69               | 1.16 (0.90,1.49)        |
| ER-positive BC + Colorectal cancer | 873                    | 51212.5       | 230              | 0.82 (0.71,0.95)        | 121                                   | 6879          | 37               | 1.23 (0.88,1.71)        |
| ER-negative BC + Colorectal cancer | 159                    | 8555          | 48               | 1.02 (0.76,1.37)        | 76                                    | 4214          | 27               | 1.02 (0.69,1.51)        |
| Uterine cancer                     | 2335                   | 147537.5      | 433              | 1.00 (Reference)        | 2335                                  | 147537.5      | 433              | 1.00 (Reference)        |
| BC + Uterine cancer                | 930                    | 60102.5       | 212              | 1.27 (1.08,1.50)        | 248                                   | 15382         | 56               | 1.92 (1.44,2.56)        |
| ER-positive BC + Uterine cancer    | 704                    | 43977.5       | 170              | 1.30 (1.09,1.56)        | 143                                   | 8636          | 35               | 2.17 (1.52,3.09)        |
| ER-negative BC + Uterine cancer    | 148                    | 10069         | 24               | 1.10 (0.72,1.66)        | 89                                    | 5668          | 17               | 1.56 (0.96,2.55)        |
| Lymphoma                           | 1202                   | 60396.5       | 391              | 1.00 (Reference)        | 1202                                  | 60396.5       | 391              | 1.00 (Reference)        |
| BC + Lymphoma                      | 460                    | 22629.5       | 168              | 1.08 (0.90,1.29)        | 70                                    | 3752          | 27               | 1.78 (1.19,2.66)        |
| ER-positive BC + Lymphoma          | 386                    | 18550.5       | 139              | 1.06 (0.87,1.28)        | 44                                    | 2385          | 14               | 1.52 (0.88,2.60)        |
| ER-negative BC + Lymphoma          | 46                     | 2234.5        | 22               | 1.54 (1.00,2.38)        | 23                                    | 1115          | 12               | 2.29 (1.27,4.13)        |
| Thyroid cancer                     | 1237                   | 86451.5       | 32               | 1.00 (Reference)        | 1237                                  | 86451.5       | 32               | 1.00 (Reference)        |
| BC + Thyroid cancer                | 391                    | 28081         | 17               | 1.34 (0.71,2.51)        | 130                                   | 9477          | 6                | 3.50 (1.40,8.76)        |
| ER-positive BC + Thyroid cancer    | 314                    | 21561         | 12               | 1.04 (0.51,2.16)        | 81                                    | 5572          | 4                | 4.16 (1.40,12.35)       |
| ER-negative BC + Thyroid cancer    | 54                     | 4038          | 3                | 2.72 (0.80,9.27)        | 44                                    | 3433          | 2                | 2.80 (0.62,12.60)       |
| Melanoma                           | 1240                   | 81894.5       | 106              | 1.00 (Reference)        | 1240                                  | 81894.5       | 106              | 1.00 (Reference)        |
| BC + Melanoma                      | 481                    | 32854         | 50               | 0.90 (0.63,1.28)        | 143                                   | 9883.5        | 13               | 1.34 (0.71,2.51)        |



|                                    | Surgery + Radiotherapy |               |                  |                         | Surgery + Radiotherapy + Chemotherapy |               |                  |                         |
|------------------------------------|------------------------|---------------|------------------|-------------------------|---------------------------------------|---------------|------------------|-------------------------|
|                                    | Number of cases        | Person-months | Number of deaths | HR (95%CI) <sup>1</sup> | Number of cases                       | Person-months | Number of deaths | HR (95%CI) <sup>1</sup> |
| ER-positive BC + Melanoma          | 383                    | 25573.5       | 37               | 0.73 (0.49,1.10)        | 92                                    | 6258          | 7                | 1.03 (0.44,2.44)        |
| ER-negative BC + Melanoma          | 71                     | 4900.5        | 9                | 1.87 (0.94,3.71)        | 44                                    | 3127.5        | 5                | 1.75 (0.70,4.38)        |
| Ovarian cancer                     | 1113                   | 49886         | 631              | 1.00 (Reference)        | 1113                                  | 49886         | 631              | 1.00 (Reference)        |
| BC + Ovarian cancer                | 405                    | 19007.5       | 236              | 0.91 (0.78,1.06)        | 143                                   | 7236.5        | 82               | 1.01 (0.79,1.28)        |
| ER-positive BC + Ovarian cancer    | 282                    | 12651         | 170              | 0.91 (0.77,1.08)        | 56                                    | 2669.5        | 37               | 1.18 (0.84,1.65)        |
| ER-negative BC + Ovarian cancer    | 98                     | 5109          | 49               | 0.91 (0.67,1.22)        | 80                                    | 4166          | 41               | 0.97 (0.70,1.34)        |
| Pancreatic cancer                  | 1093                   | 12472.5       | 959              | 1.00 (Reference)        | 1093                                  | 12472.5       | 959              | 1.00 (Reference)        |
| BC + Pancreatic cancer             | 426                    | 5255          | 376              | 0.97 (0.86,1.10)        | 80                                    | 1379          | 69               | 0.89 (0.69,1.15)        |
| ER-positive BC + Pancreatic cancer | 336                    | 4098          | 300              | 0.97 (0.85,1.10)        | 45                                    | 734           | 39               | 0.95 (0.68,1.32)        |
| ER-negative BC + Pancreatic cancer | 54                     | 803           | 44               | 1.02 (0.75,1.38)        | 28                                    | 441           | 24               | 0.88 (0.59,1.33)        |
| Leukemia                           | 1265                   | 53258         | 576              | 1.00 (Reference)        | 1265                                  | 53258         | 576              | 1.00 (Reference)        |
| BC + Leukemia                      | 409                    | 14339         | 229              | 1.30 (1.12,1.52)        | 157                                   | 4421.5        | 104              | 1.97 (1.59,2.45)        |
| ER-positive BC + Leukemia          | 307                    | 11472.5       | 162              | 1.16 (0.98,1.39)        | 90                                    | 2762.5        | 58               | 1.82 (1.38,2.41)        |
| ER-negative BC + Leukemia          | 78                     | 2170.5        | 50               | 1.86 (1.39,2.49)        | 60                                    | 1636          | 40               | 1.97 (1.42,2.73)        |

FPC: first primary cancer, SPC: second primary cancer, HR: hazard ratio, CI: confidence interval, ER: estrogen receptor, BC: breast cancer

<sup>1</sup>Models adjusted for race, year of diagnosis, age at diagnosis, tumor stage, and treatments (surgery, chemotherapy, and radiotherapy). For breast cancer, we further adjusted for estrogen receptor status. For leukemia, we omitted surgery (it was not a treatment option) and tumor stage (all leukemia were distant stage).
